# Supplementary material for: Fever-Range Hyperthermia Promotes Macrophage Polarization towards Regulatory Phenotype M2b
Source: MDPI journal article supplement (doi:10.3390/ijms242417574), 2023-12-17
Supplement: s1 [file s1]

Full unedited blot for figure 3

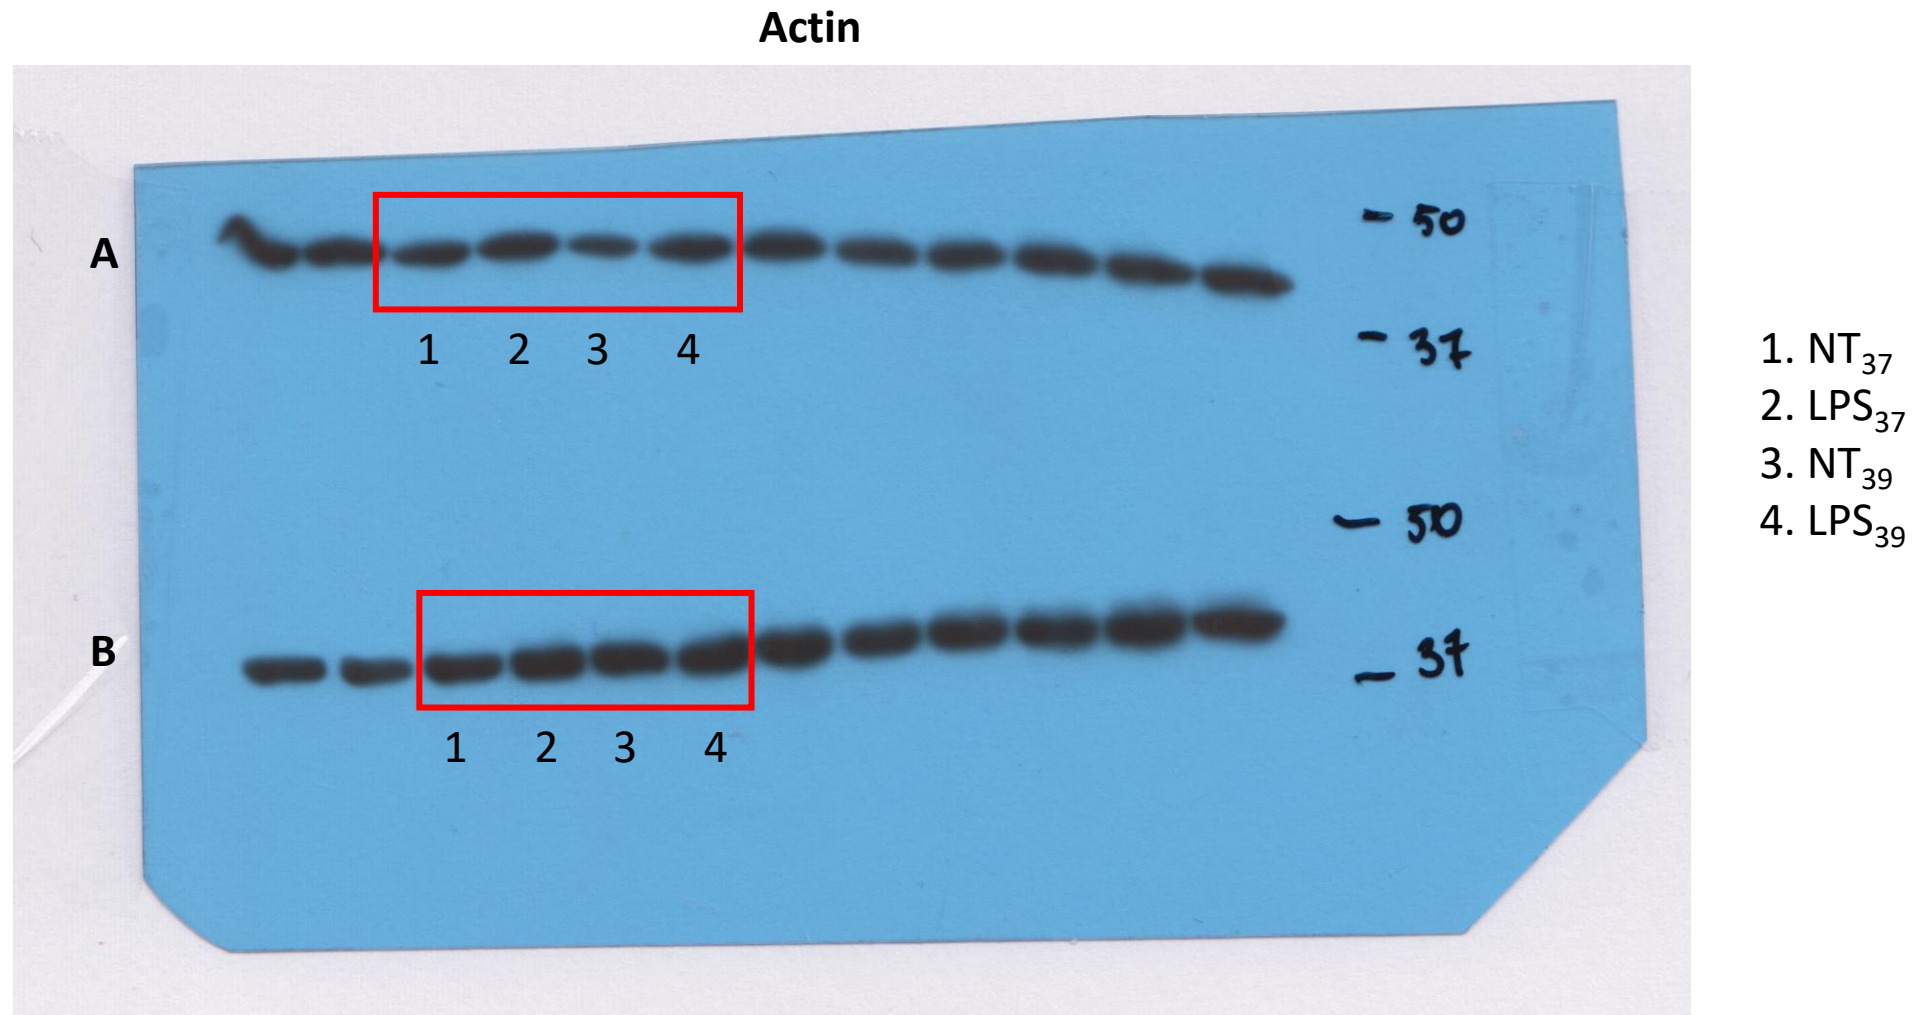

A) J774.1A cells

B) RAW264.7 cells

Full unedited blot for figure 3

### COX-2

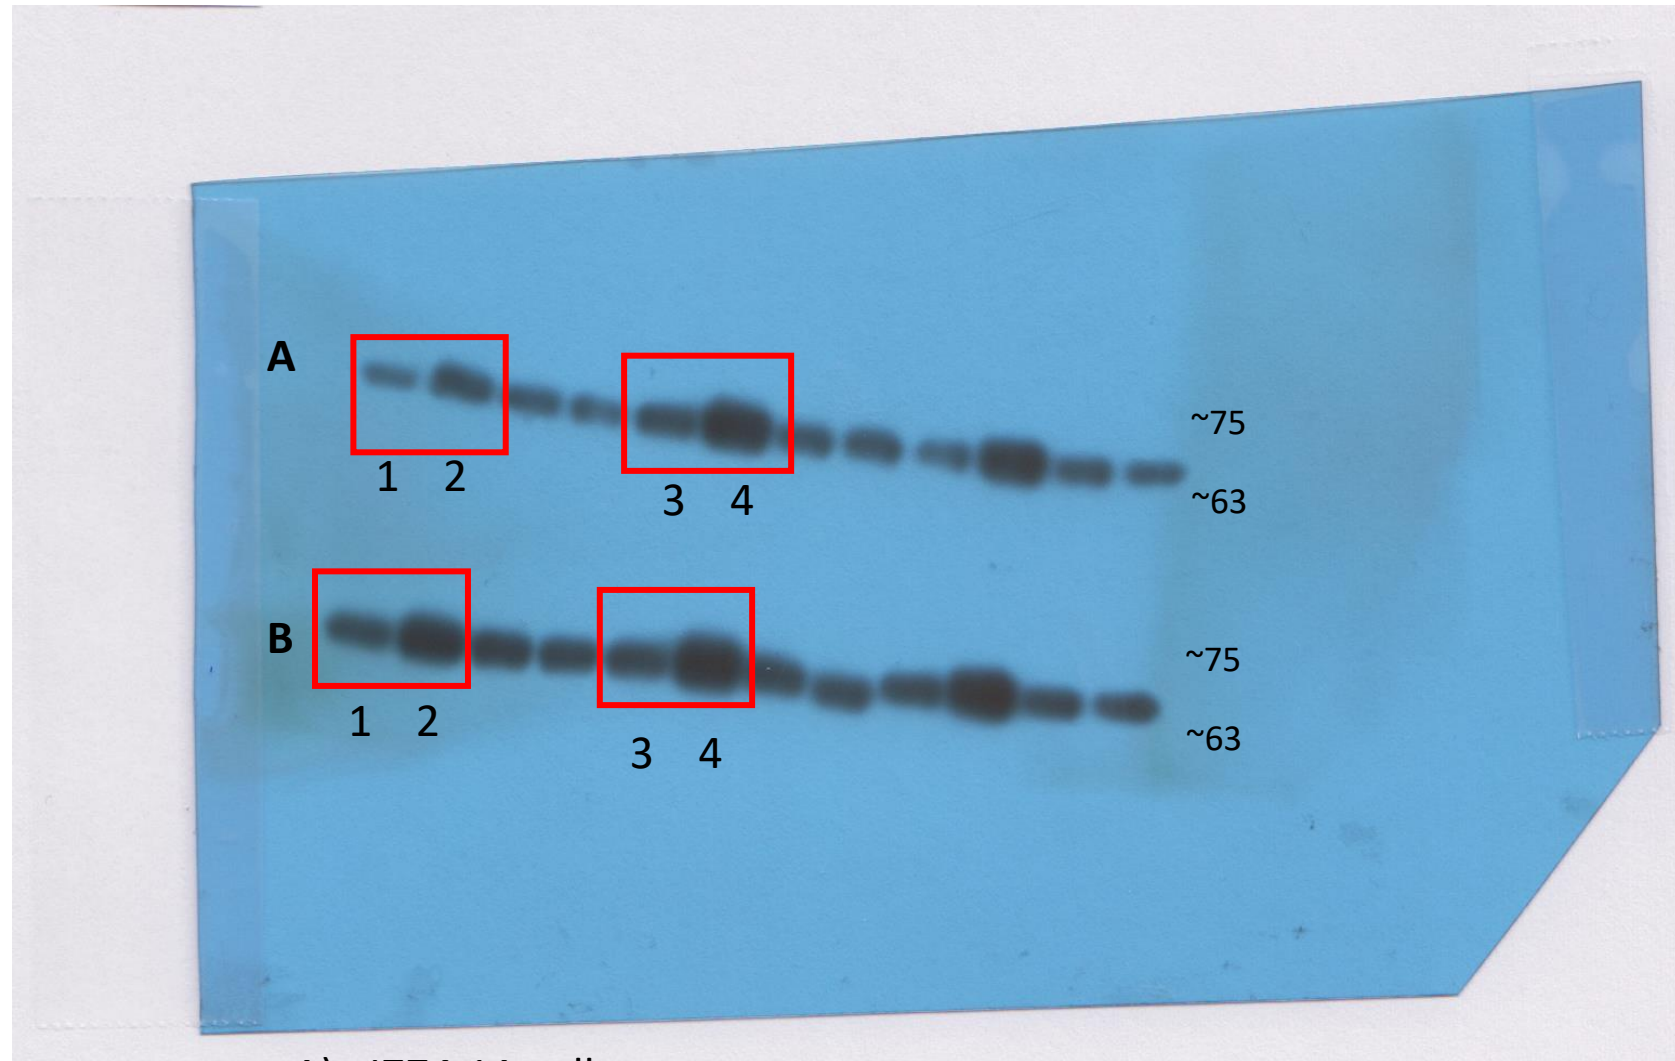

- 1. NT<sub>37</sub>
- 2. LPS<sub>37</sub>
- 3. NT<sub>39</sub>
- 4. LPS<sub>39</sub>

A) J774.1A cells  
B) RAW264.7 cells

Full unedited blot for figure 3

TLR-4

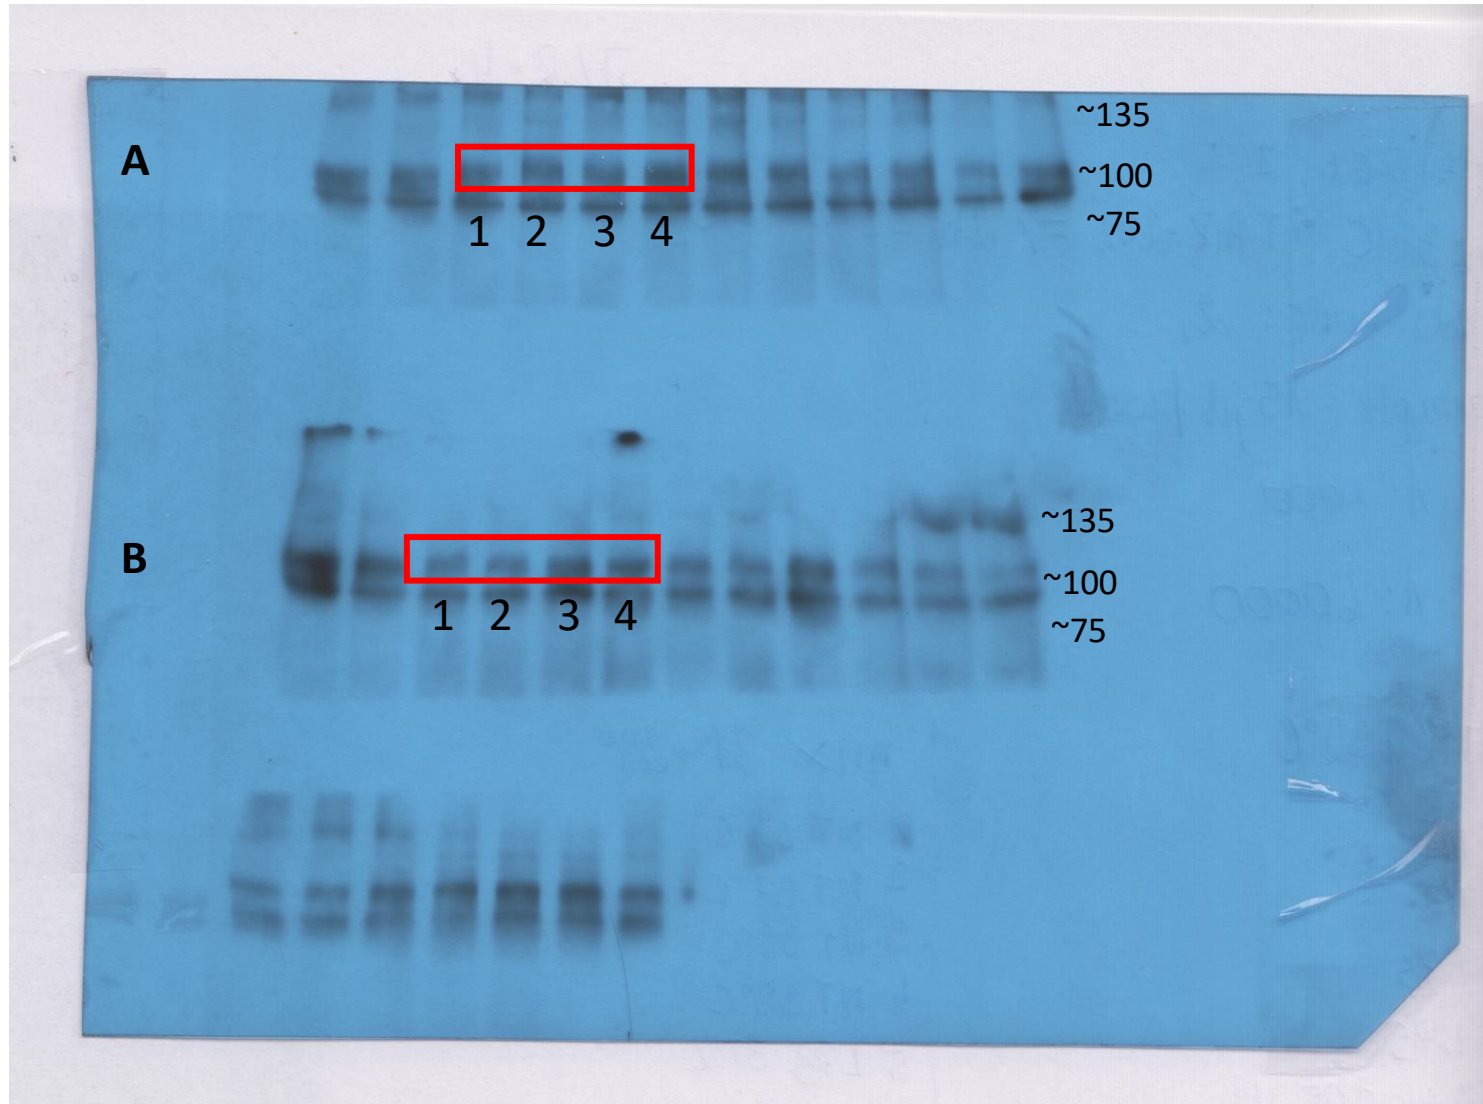

1. NT<sub>37</sub>
2. LPS<sub>37</sub>
3. NT<sub>39</sub>
4. LPS<sub>39</sub>

- A) J774.1A cells  
B) RAW264.7 cells

Full unedited blot for figure 6

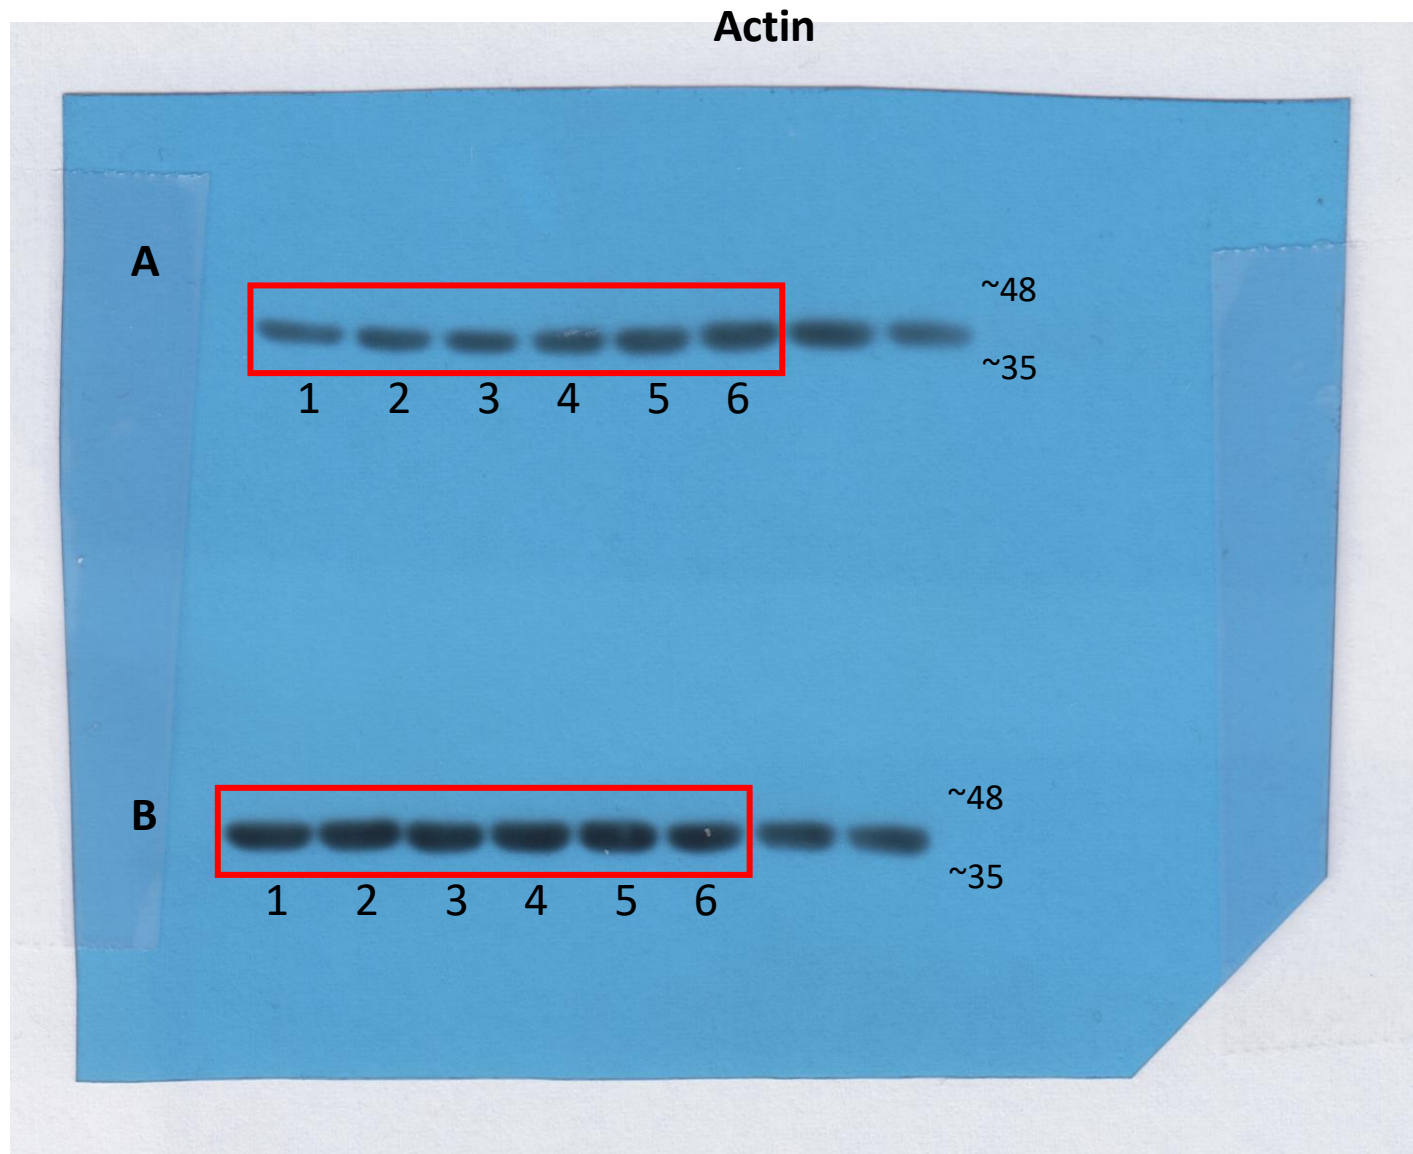

1. NT<sub>37</sub>
2. LPS<sub>37</sub>
3. TAK<sub>37</sub>
4. NT<sub>39</sub>
5. LPS<sub>39</sub>
6. TAK<sub>37</sub>

A) J774.1A cells

B) RAW264.7 cells

Full unedited blot for figure 6

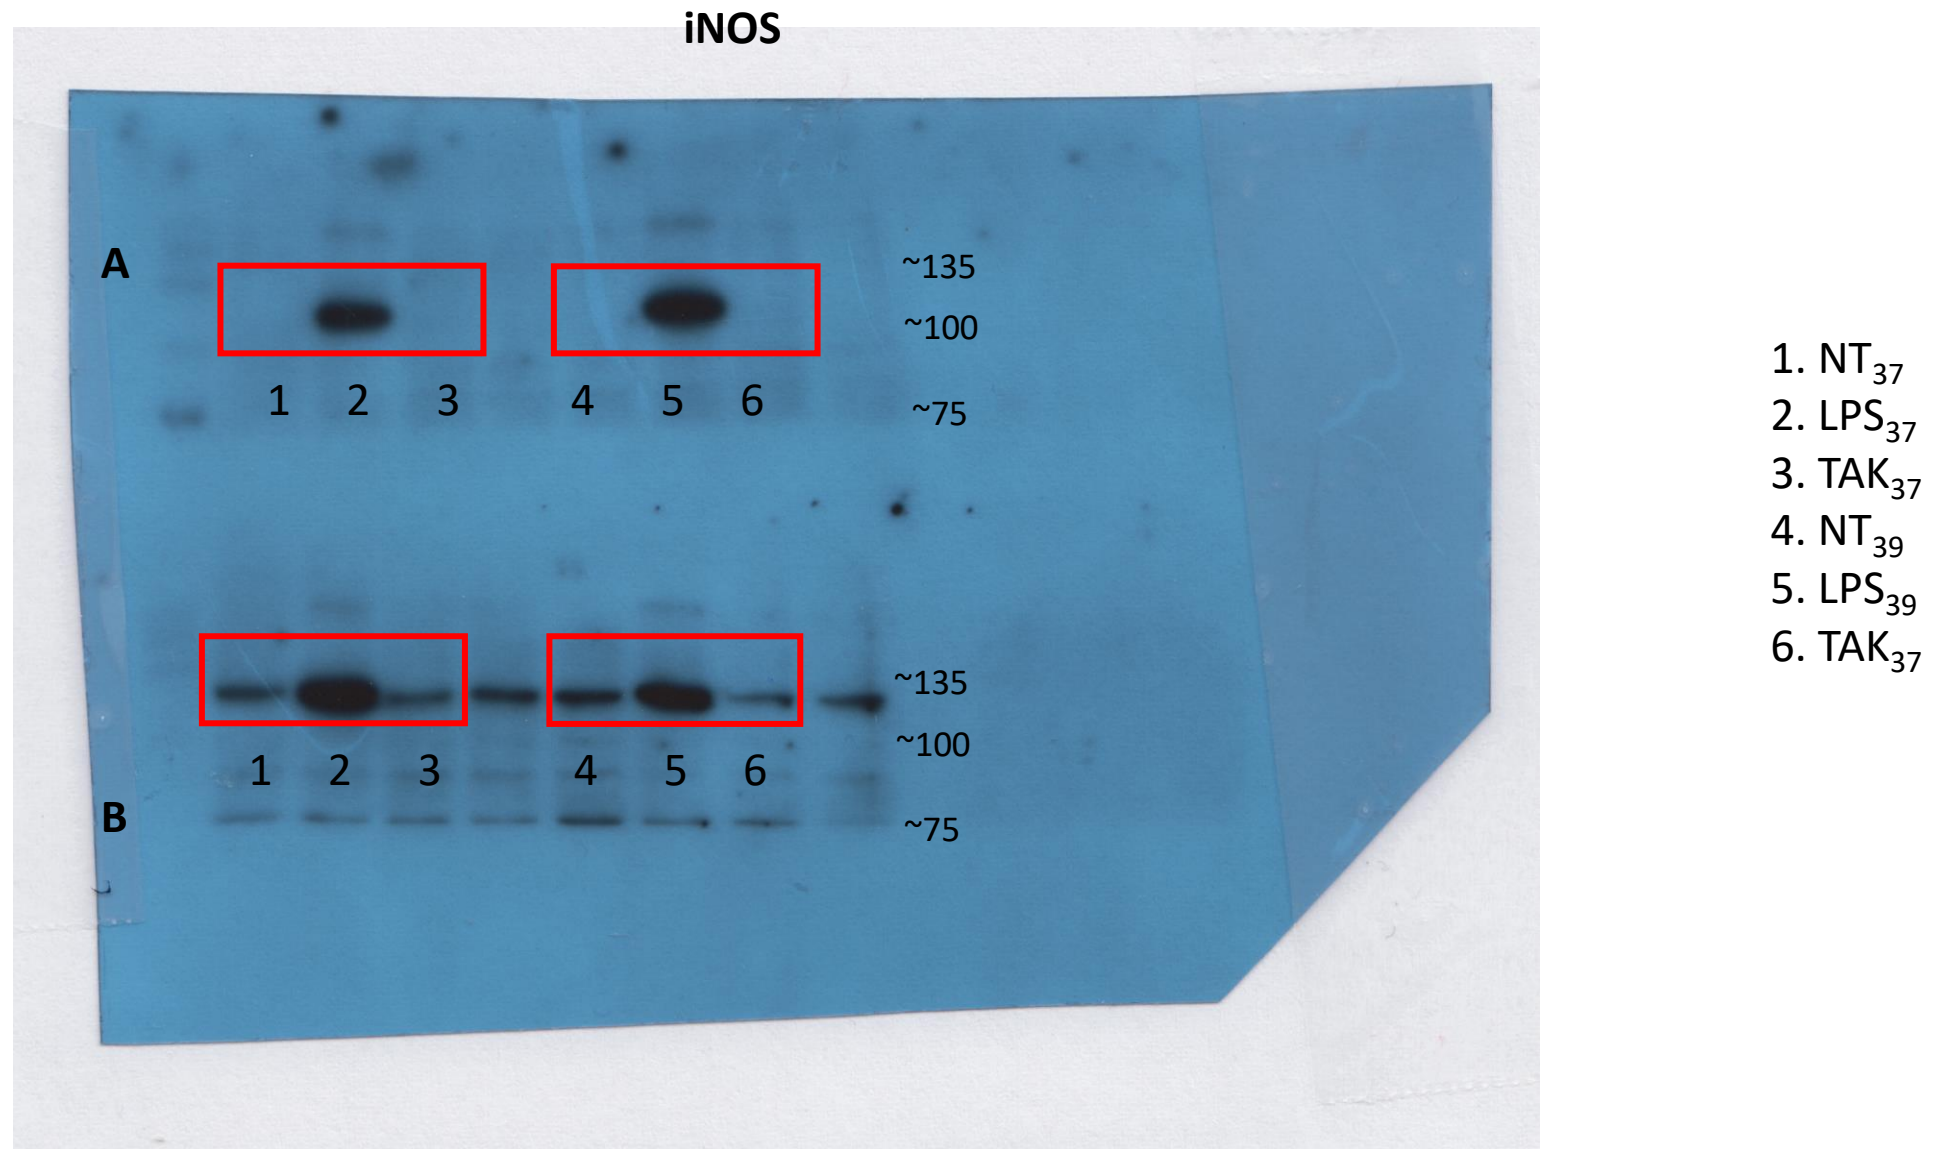

A) J774.1A cells

B) RAW264.7 cells

Full unedited blot for figure 6

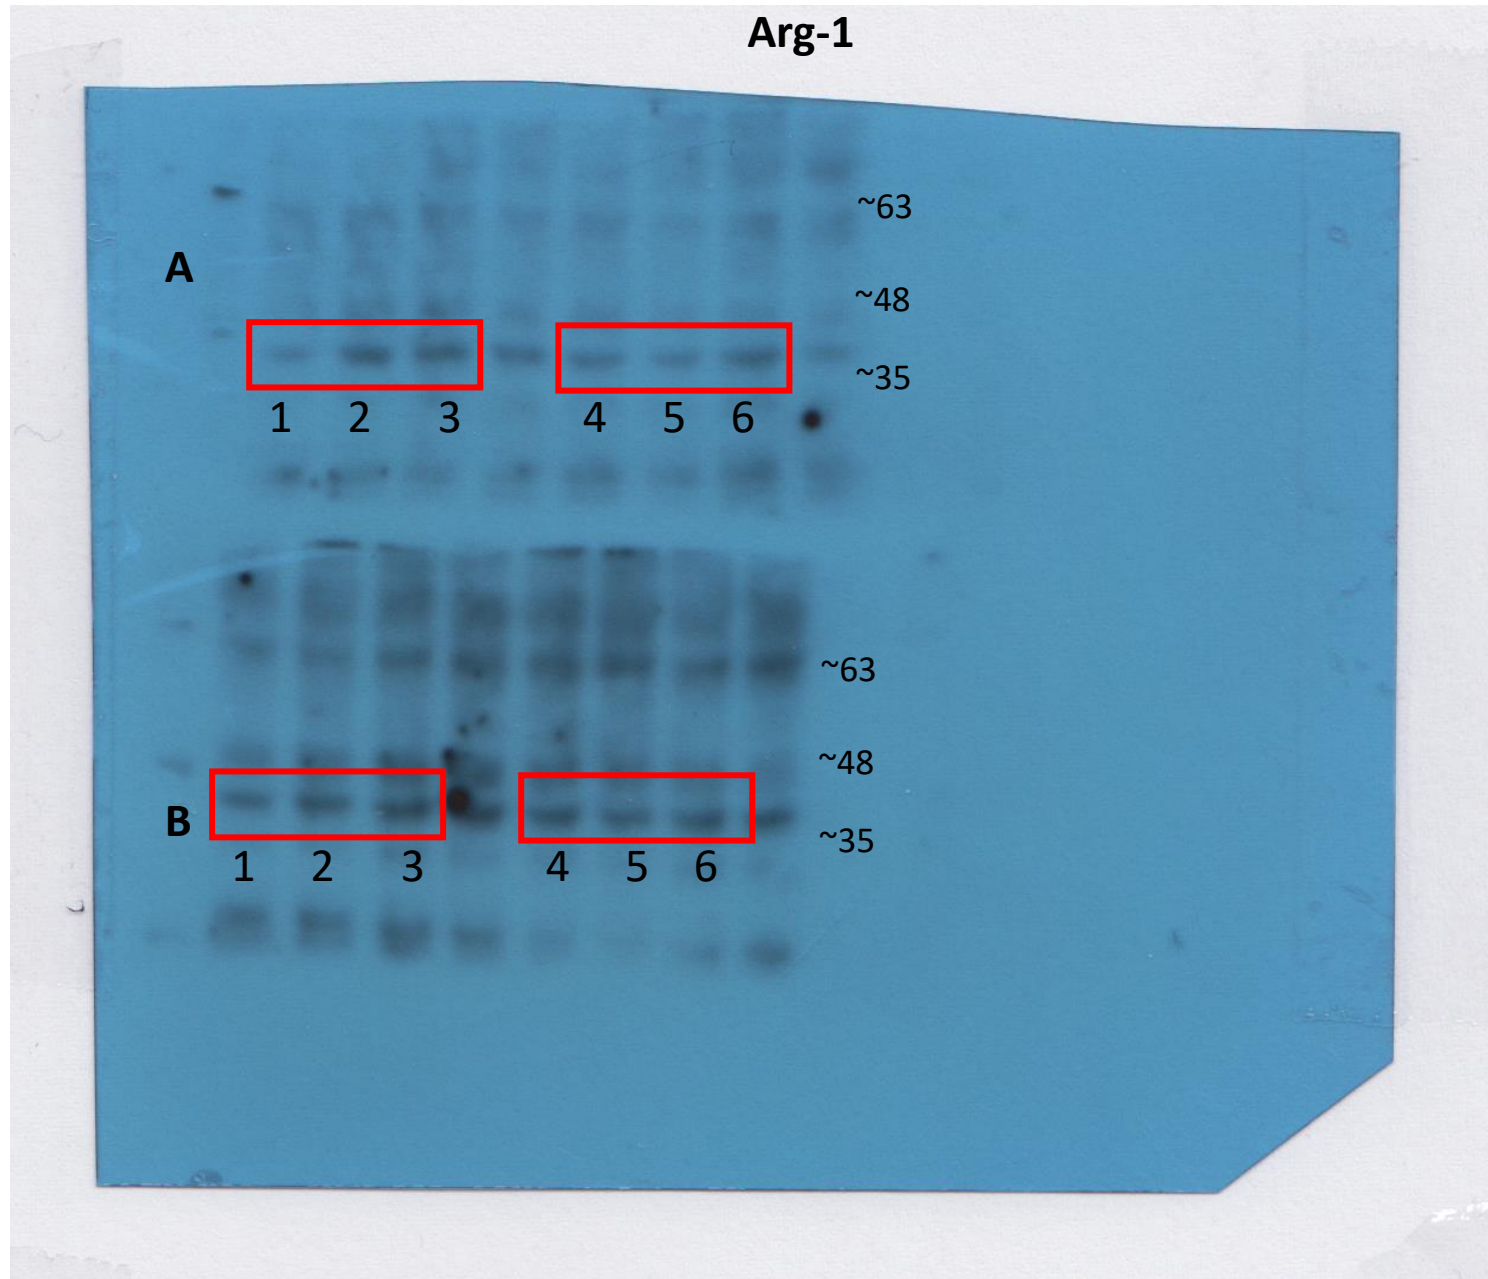

1. NT<sub>37</sub>
2. LPS<sub>37</sub>
3. TAK<sub>37</sub>
4. NT<sub>39</sub>
5. LPS<sub>39</sub>
6. TAK<sub>37</sub>

A) J774.1A cells  
B) RAW264.7 cells
